# Supplementary material
Source: publisher site journal article supplement (https://www.spandidos-publications.com/75/downloadSupplementary)

Figure S1. Effects of the inhibition of si-WDR62 in BC cell lines. (A and B) WDR62 expression levels were evaluated in BC cells at 72 h following the transfection of si-WDR62\_1 and si-WDR62\_2 into BC cells by (A) RT-qPCR and (B) western blot analyses. *GUSB* and  $\beta$ -actin was used as a control.

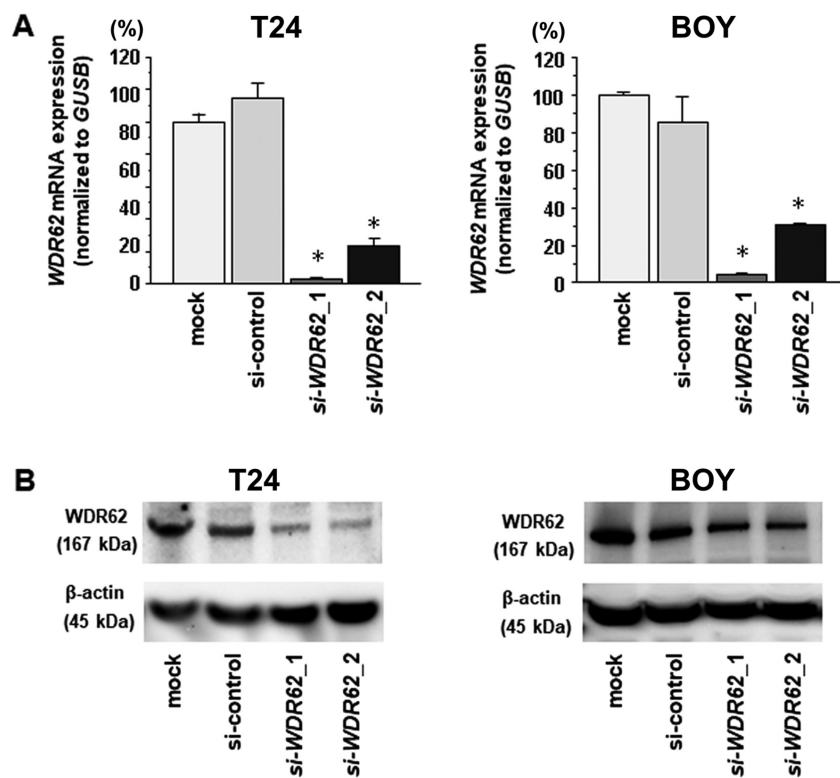

Supplement: Supplementary file 1 [file downloadSupplementary]
